# Supplementary material for: Evaluating the performance of an integrated membrane-aerated biofilm reactor (MABR) system for high-strength brewery wastewater treatment
Source: Royal Society of Chemistry journal article supplement (doi:10.1039/d2ew00873d), 2023-01-01
Supplement: d2ew00873d1.pdf [file d2ew00873d1.pdf]

1 **Supplementary materials for:**

2 **Evaluating the performance of integrated membrane-aerated biofilm**

3 **reactor (MABR) system for high-strength brewery wastewater treatment**

4

5 **Table S1** The effect of coagulation/flocculation process at different PAC dosages along with constant 6

6 mL PAM ( $2 \text{ g L}^{-1}$ ) dosage in each flask experiment (500 mL wastewater).

| <b>PAC/<math>50 \text{ g L}^{-1}</math></b> | <b>COD concentration</b>               | <b>Removal efficiency</b> | <b>Turbidity</b> |
|---------------------------------------------|----------------------------------------|---------------------------|------------------|
| <b>(mL)</b>                                 | <b>(<math>\text{mg L}^{-1}</math>)</b> | <b>(%)</b>                | <b>(NTU)</b>     |
| <b>0</b>                                    | 8100                                   | 0                         | 42.4             |
| <b>2</b>                                    | 7000                                   | 13.6                      | 1.5              |
| <b>5</b>                                    | 6600                                   | 18.5                      | 0.5              |
| <b>7</b>                                    | 5700                                   | 29.6                      | 0.25             |
| <b>10</b>                                   | 6000                                   | 25.9                      | 0.17             |
| <b>15</b>                                   | 6000                                   | 25.9                      | 0.73             |

7

9 **Table S2** The effect of coagulation/flocculation process at different PAM dosages along with constant 7  
 10 mL PAC (5%) dosage in each flask experiment (500 mL wastewater).

| <b>PAM/2 g L<sup>-1</sup></b> | <b>COD concentration</b>   | <b>Removal efficiency</b> | <b>Turbidity</b> |
|-------------------------------|----------------------------|---------------------------|------------------|
| <b>(mL)</b>                   | <b>(mg L<sup>-1</sup>)</b> | <b>(%)</b>                | <b>(NTU)</b>     |
| <b>0</b>                      | 8100                       | 0                         | 42.4             |
| <b>2</b>                      | 6100                       | 24.7                      | 0.04             |
| <b>4</b>                      | 5900                       | 27.2                      | 0.05             |
| <b>6</b>                      | 5700                       | 29.5                      | 0.04             |
| <b>8</b>                      | 6400                       | 21.0                      | 0.23             |
| <b>10</b>                     | 6600                       | 18.5                      | 0.07             |

11

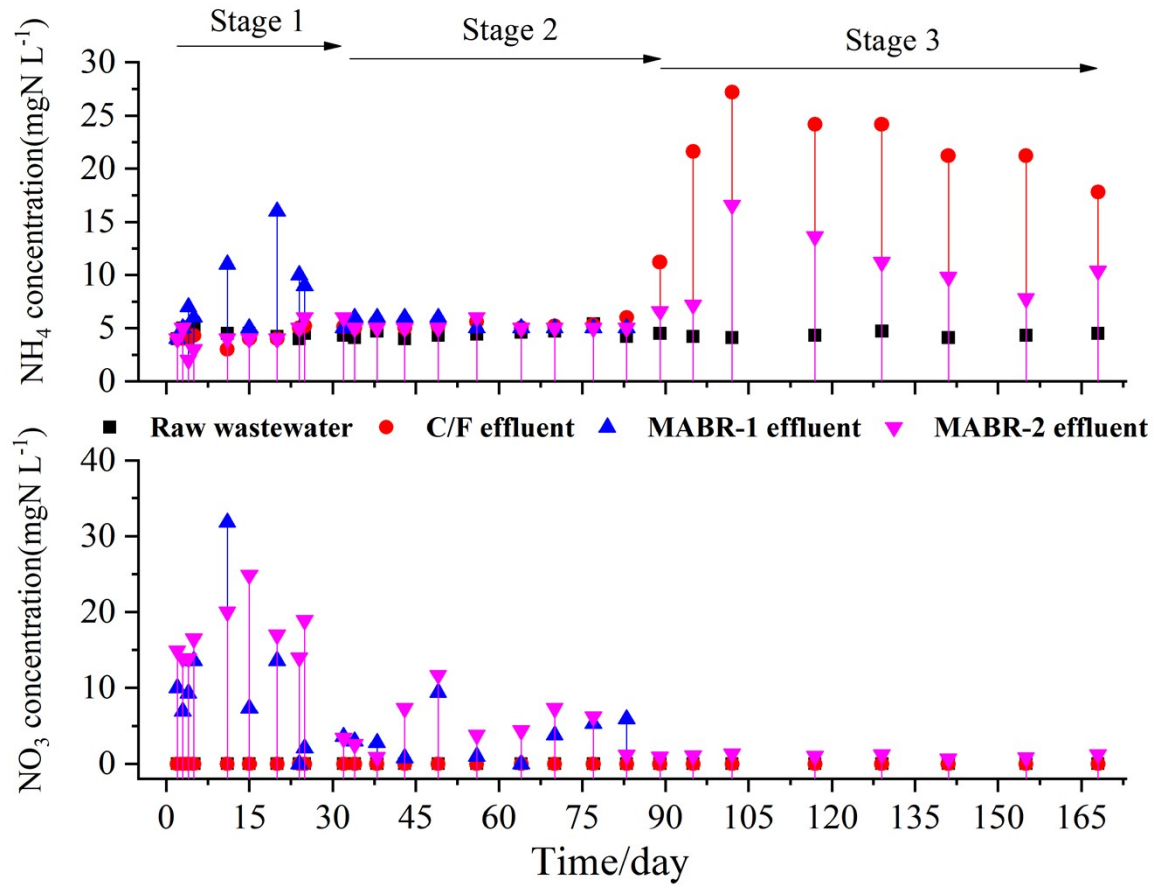

13

14 **Fig. S1** (a) Ammonia (NH<sub>4</sub><sup>+</sup>-N) and (b) nitrate (NO<sub>3</sub><sup>-</sup>-N) concentrations in influent and effluent at different  
 15 units throughout the operational period.

16

17

18

19

20

21

22

23

24

25

26

27

28

29

30

31

32

33  
34

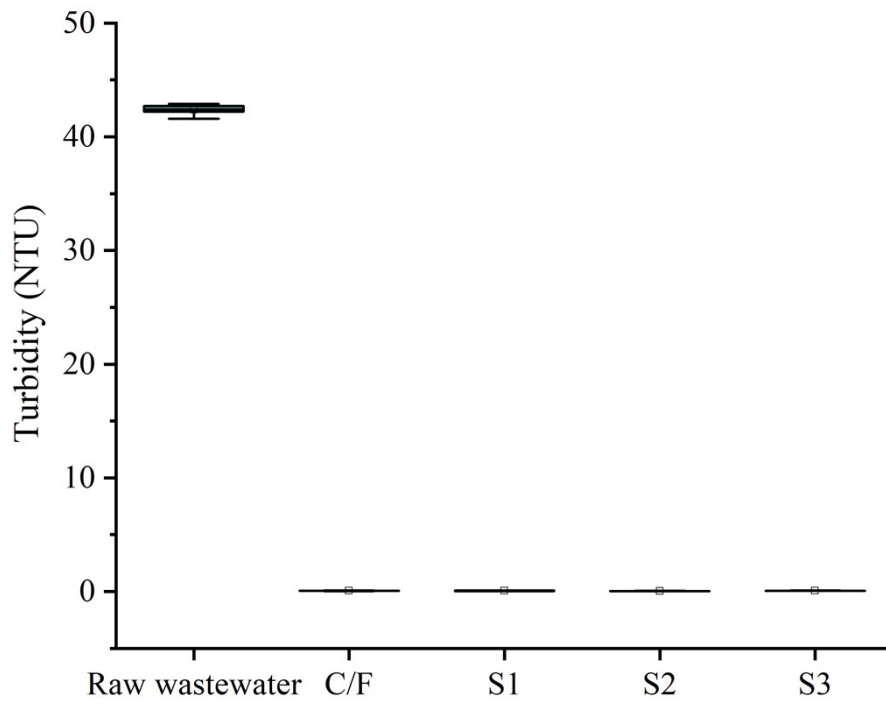

35

36 **Fig. S2** Turbidity in raw wastewater, C/F effluent (C/F), effluent at Stage 1 (S1), effluent at Stage 2 (S2)  
37 and effluent at Stage 3 (S3).

38  
39  
40  
41

43

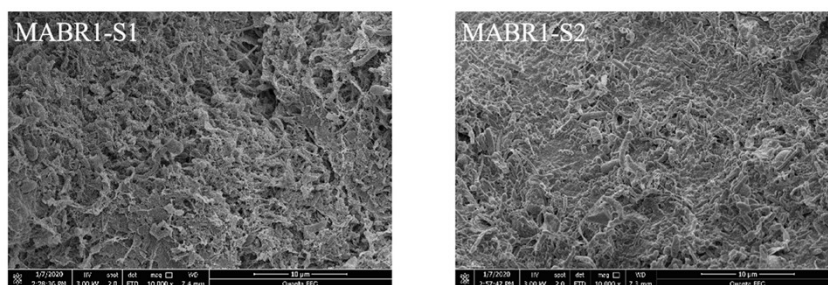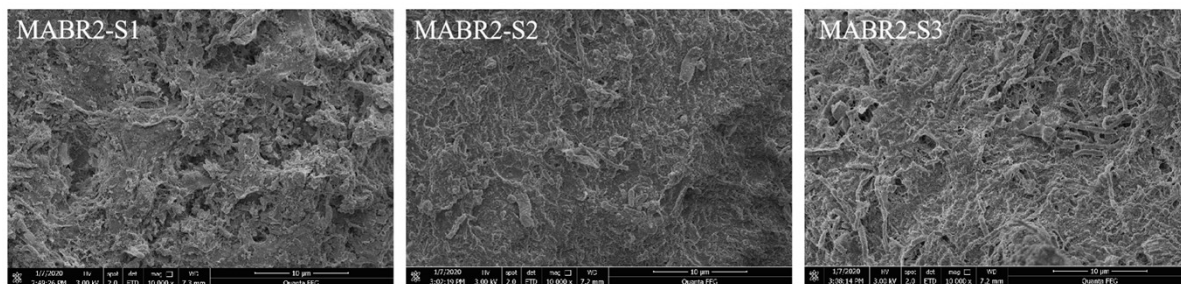

44

45 **Fig. S3** Scanning electron microscopy (SEM) images of biofilm at different bioreactor units and  
46 operational periods.

47

48

49

50

51

52

53

54

55

56

57

58

59

60

61

62

63

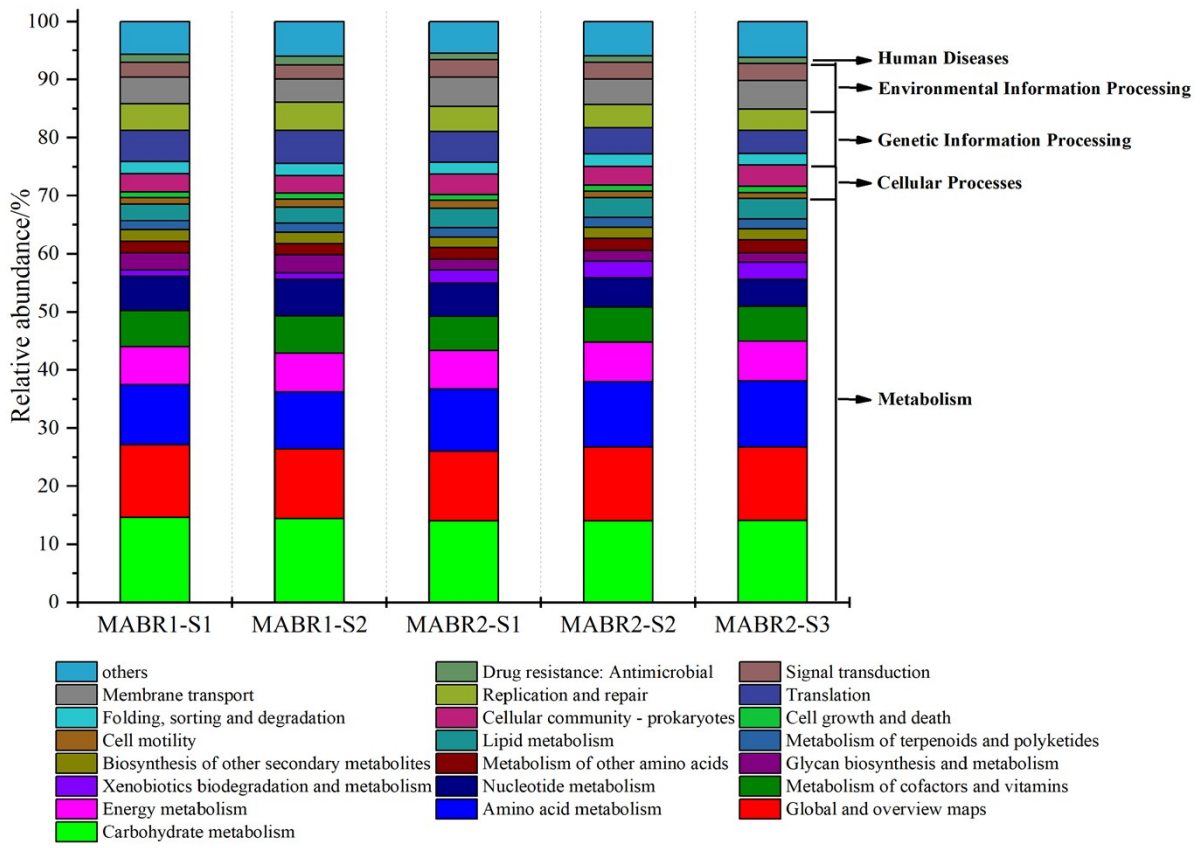

65

66 **Fig. S4** Relative abundances of KEGG pathway level2 in different MABR biofilms.

## 68 **Section S1- Initial biofilm formation and fast start-up**

69 The seeding sludge, originated from the oxidation ditch of activated sludge stream at  
70 Wulongkou wastewater treatment plant (WWTPs) (Zhengzhou, China), was inoculated into  
71 the membrane surface. A thin and compact biofilm was formed on the membranes after ten  
72 days. During the period, glucose (300–500 mg/L, as readily biodegradable carbon source for  
73 faster growth of microorganisms) and ammonium chloride ( $\text{NH}_4\text{Cl}$ ) (45-50 mg N/L) together  
74 with low concentration of sodium nitrate ( $\text{NaNO}_3$ ) (3.1–5.8 mg N/L) were supplied as the  
75 organic carbon and inorganic nitrogen source, respectively. Subsequently, the biofilms were  
76 suffered from the effluent wastewater from C/F unit for the fast start-up and acclimation  
77 during the first two weeks (Stage 1) in the long-term process.

## 78 **Section S2- Results of C/F optimization experiment**

79 It can be seen that the COD removal efficiency was highest under the following C/F  
80 conditions: 7 mL PAC ( $50 \text{ g L}^{-1}$ ) dosage, 6 mL PAM ( $2 \text{ g L}^{-1}$ ) dosage for each 500 mL raw  
81 wastewater based on Fig.S1 and Fig.S2. Meanwhile, TN, TP and turbidity also decreased  
82 substantially (TN: from  $42.2 \text{ mg L}^{-1}$  to  $27.8 \text{ mg L}^{-1}$ , TP: from  $32.8 \text{ mg L}^{-1}$  to  $9.2 \text{ mg L}^{-1}$ ,  
83 turbidity: 42.4 NTU to 0.04 NTU). Thus, the ultimate concentrations of PAC and PAM in  
84 raw brewery wastewater were defined as  $700 \text{ mg PAC L}^{-1}$  and  $25 \text{ mg PAM L}^{-1}$ , respectively.

85
